# Supplementary material
Source: HighWire-hosted journal article supplement (https://jnis.bmj.com/content/15/e2/e229)
Supplement: inline-supplementary-material-1 [file inline-supplementary-material-1.pdf]

## SUPPLEMENTAL MATERIAL

**Intravenous thrombolysis upon flow restoration improves outcome in endovascular thrombectomy****Supplementary Figure 1.** Flow diagram for patient inclusion.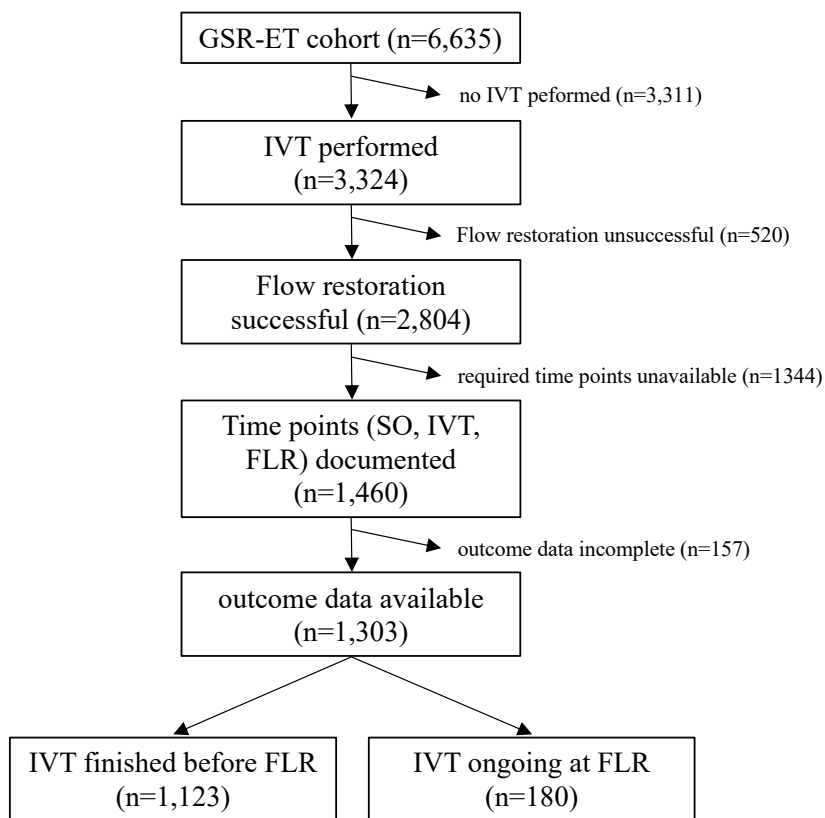

*SO* indicates symptom onset; *IVT*, intravenous thrombolysis; *FLR*, flow restoration.

**GSR-ET Collaborators**

A. Alegiani, J. Berrouschot, T. Boeck-Behrens, G. Bohner, J. Borggreffe, A. Bormann, M. Braun, B. Eckert, R.M. Eckert, U. Ernemann, M. Ernst, J. Fiehler, C. Gerloff, K. Gröschel, G.F. Hamann, K.H. Henn, L. Kellert, C. Kraemer, H. Leischner, J. Liman, A. Ludolph, O. Nikoubashman, C.H. Nolte, M. Petersen, S. Poli, A. Reich, J. Röther, J.H. Schäfer, P. Schellinger, E. Siebert, F. Stögbauer, G. Thomalla, S. Tiedt, C. Trumm, T. Uphaus, S. Wunderlich.
